# Supplementary material
Source: PubMed Central journal article supplement (PMC4288258)
Supplement: supp_O114.041772_mcp.O114.041772-1.pdf [file supp_O114.041772_mcp.O114.041772-1.pdf]

## cysTMTRAQ – an integrative method for unbiased thiol-based redox proteomics

Jennifer Parker<sup>1,2,&</sup>, Kelly Balmant<sup>1,2,&</sup>, Fanchao Zhu<sup>1</sup>, Ning Zhu<sup>1</sup>, Sixue Chen<sup>1,2,3</sup>

<sup>1</sup>Department of Biology, Genetics Institute, University of Florida, Gainesville, Florida, USA

<sup>2</sup>Plant Molecular and Cellular Biology Program, University of Florida, Gainesville, Florida, USA

<sup>3</sup>Interdisciplinary Center for Biotechnology Research, University of Florida, Florida, USA

<sup>&</sup> These authors contributed equally to this work.

Supplementary information is available in the online version of the paper.

**Figure S1.** CysTMTRAQ data analysis workflow.

**Figure S2.** Experimental workflow of the cysTMTRAQ labeling procedure.

**Figure S3.** Performance of the cysTMTRAQ labeling at peptide level.

**Figure S4.** Performance of the cysTMTRAQ labeling at peptide level- iTRAQ quantification of cysteine-containing peptides.

**Figure S5.** Performance of the cysTMTRAQ labeling at protein level.

**Figure S6.** Experimental workflow of the identification of redox cysteines using cysTMTRAQ.

**Figure S7.** Identification and quantification of cysteine redox changes by cysTMT peptides and total peptide level changes by iTRAQ peptides.

**Figure S8.** Identification and quantification of thiol redox proteins by cysTMT peptides and total protein level changes by iTRAQ peptides.

**Figure S9.** Experimental workflow of a biological application of cysTMTRAQ in identification of thiol redox proteins in *E. coli* after oxidative stress treatment.

**Table S1.** Redox regulated cysteine containing peptides before and after correction of protein level changes.

**Table S2.** Peptides identified and quantified in the cysTMTRAQ double labeling feasibility experiment.

**Table S3.** Peptides identified and quantified in the experiment of mapping and quantification of cysteine redox changes.

**Table S4.** Peptides identified and quantified in the experiment of biological application of cysTMTRAQ.

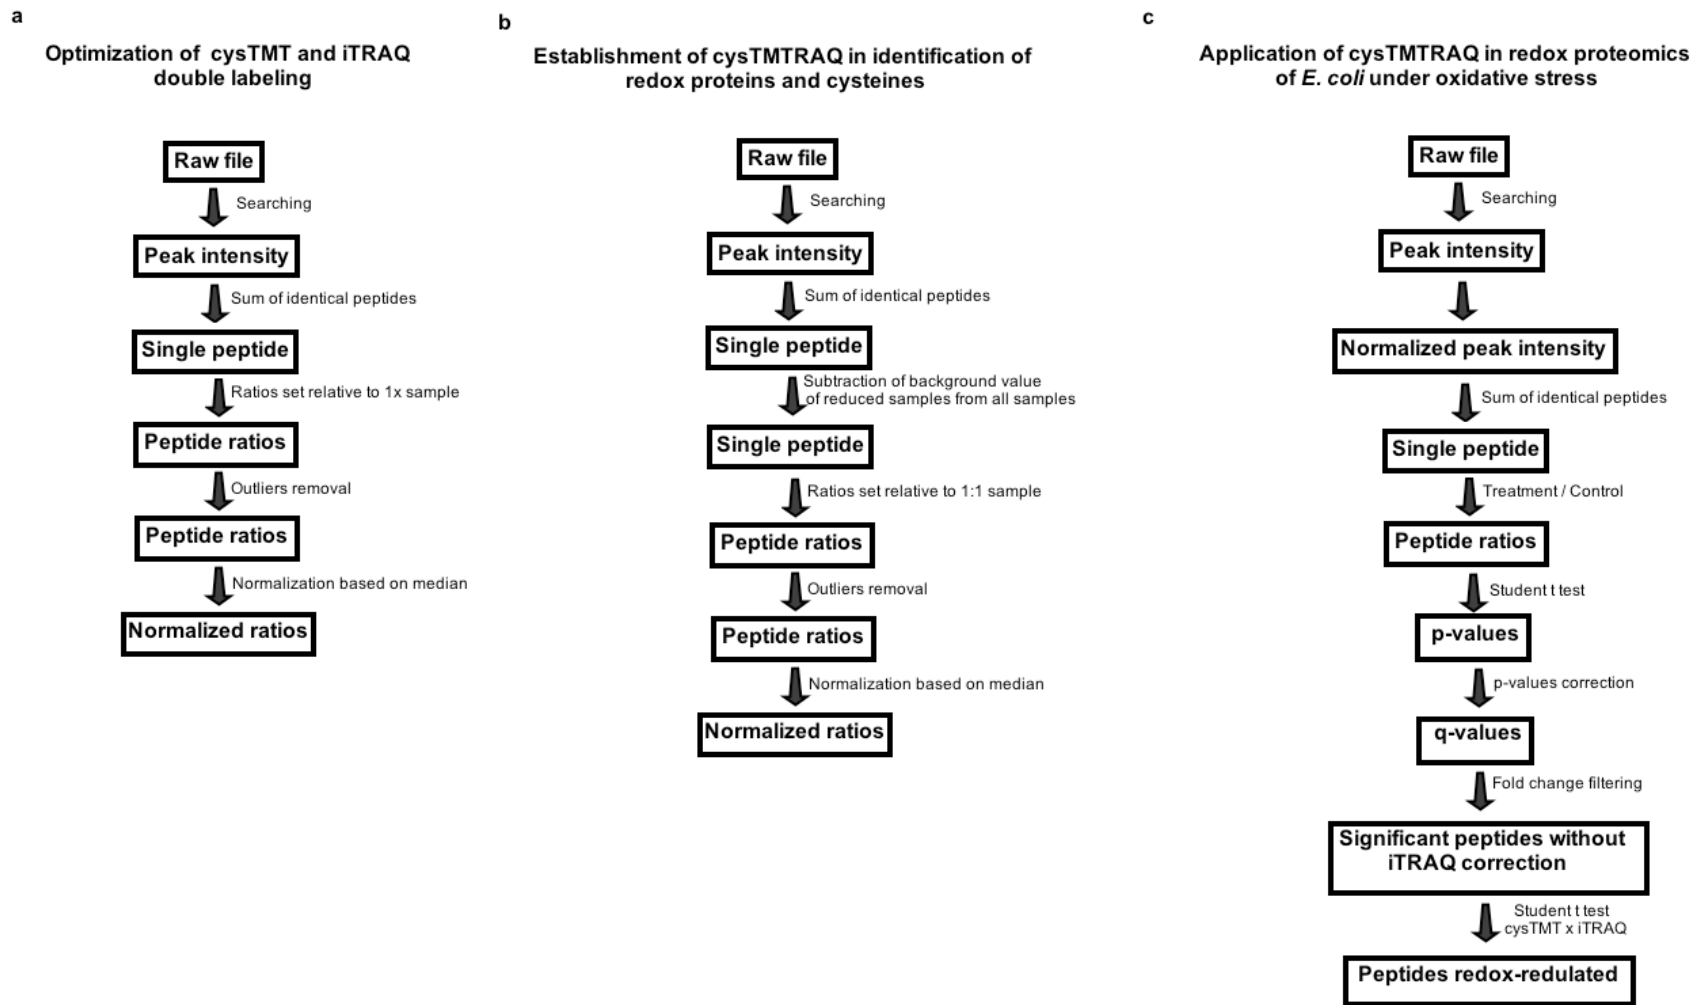

**Figure S1.** cystMTTRAQ data analysis workflow.

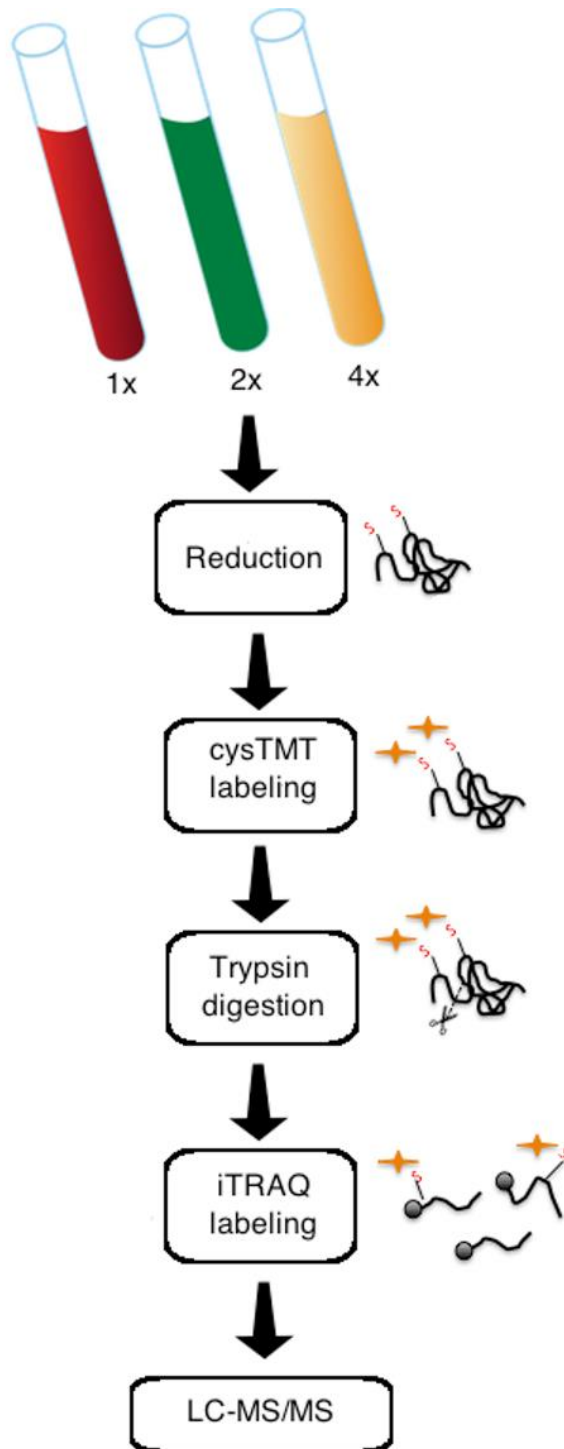

**Figure S2.** Experimental workflow of the cystTMT/iTRAQ labeling procedure. A six protein mixture (bovine serum albumin,  $\alpha$ -lactalbumin,  $\beta$ -galactosidase, lysozyme, apotransferrin, and  $\beta$ -lactoglobulin) from the AB Sciex iTRAQ labeling kit was prepared at 10  $\mu$ g, 20  $\mu$ g, and 40  $\mu$ g in order to examine 1:2:4 fold change ratios. Two independent replicates of each concentration were prepared. The scheme shows only one representative tag for cystTMT and for iTRAQ, though 6 cystTMT tags ( $m/z$  126, 127, 128, 129, 130 and 131) and 6 iTRAQ tags ( $m/z$  114, 115, 116, 117, 119 and 121) were multiplexed.

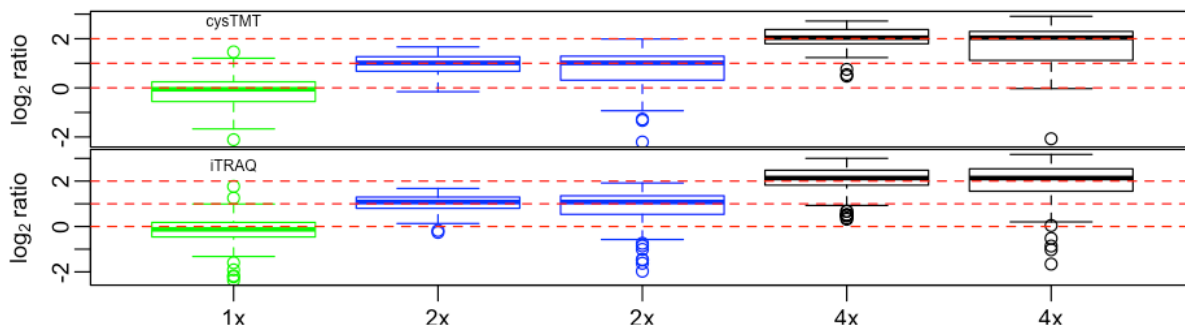

**Figure S3.** Performance of the cystMTMTRAQ labeling at peptide level. Box plots showing the measured (box and whiskers) and expected values (dashed red lines – 0,1, and 2) of peptide ratios for cystTMT and iTRAQ quantification at 1:2:4 ratios in two independent replicates. Boxplot illustrates the median (stripe), the 25<sup>th</sup> to 75<sup>th</sup> percentile (interquartile range), 1.5 times the interquartile range (whiskers), and outliers (open circles).

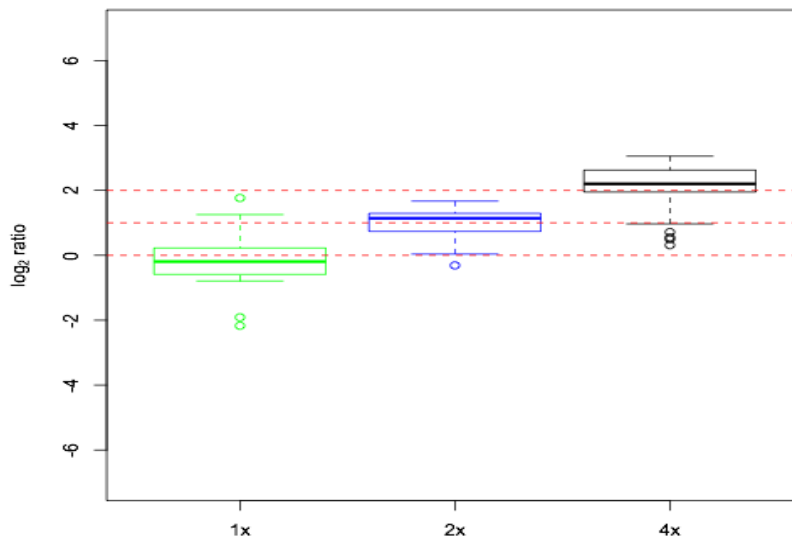

**Figure S4.** Performance of the cystMTMTRAQ labeling at peptide level-iTRAQ quantification of cysteine-containing peptides. Box plots showing the measured (box and whiskers) and expected values (dashed red lines – 0,1, and 2) of averaged peptide ratios for cystTMT and iTRAQ quantification at 1:2:4 ratios. Boxplot illustrates the median (stripe), the 25<sup>th</sup> to 75<sup>th</sup> percentile (interquartile range), 1.5 times the interquartile range (whiskers), and outliers (open circles).

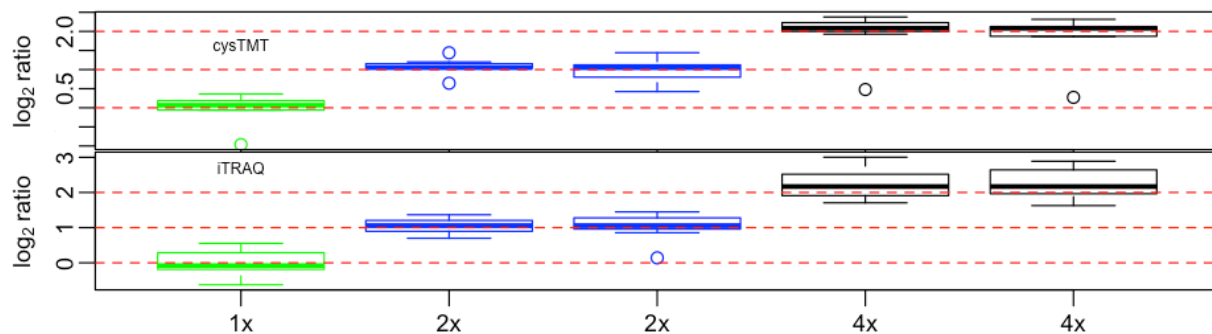

**Figure S5.** Performance of the cystMTTRAQ labeling at protein level. Box plots showing the measured (box and whiskers) and expected values (dashed red lines – 0, 1, and 2) of protein ratios for cystMT and iTRAQ quantification at 1:2:4 ratios in two independent replicates. Boxplot illustrates the median (stripe), the 25<sup>th</sup> to 75<sup>th</sup> percentile (interquartile range), 1.5 times the interquartile range (whiskers), and outliers (open circles).

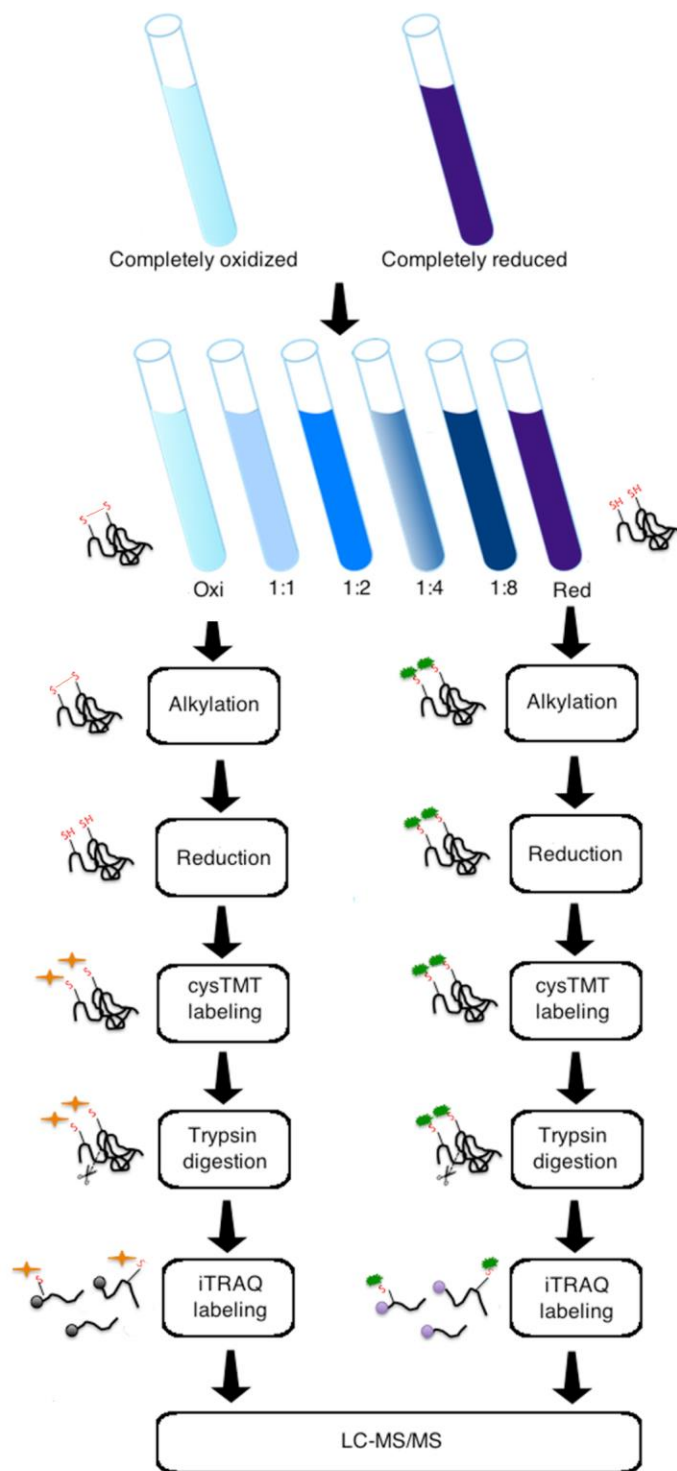

**Figure S6.** Experimental workflow of the identification of redox cysteines using cystMTTRAQ. The six protein mixture from the AB Sciex iTRAQ kit was completely oxidized and reduced, respectively. The six samples (each of 20  $\mu\text{g}$ ) represented completely oxidized, mixed with completely reduced at ratios of 1:1, 1:2, 1:4, and 1:8, and completely reduced sample. Two independent replicates of each sample were prepared. Scheme shows only one representative tag for cystTMT and for iTRAQ, though 6 cystTMT tags ( $m/z$  126, 127, 128, 129, 130 and 131) and 6 iTRAQ tags ( $m/z$  114, 115, 116, 117, 119 and 121) were multiplexed.

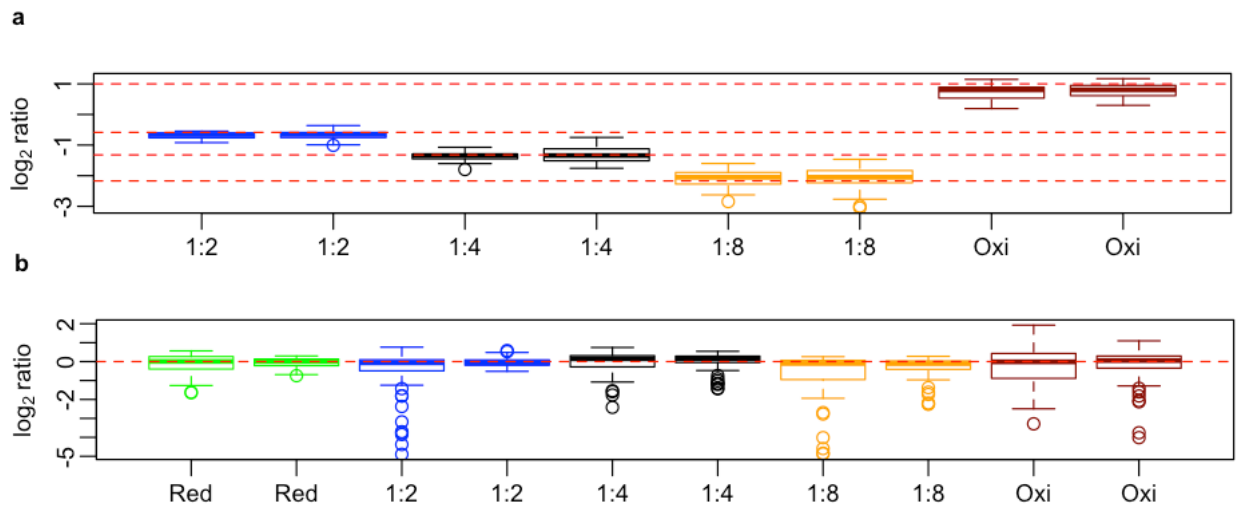

**Figure S7.** Identification and quantification of cysteine redox changes by cystTMT peptides and total peptide level changes by iTRAQ peptides. Box plot showing the measured (box and whiskers) and expected values (dashed red lines) of peptide ratios for (a) cystTMT (expected values: -0.58, -1.32, -2.17, and 1) and (b) iTRAQ (expected value: 0) quantification in samples ranged from oxidized to reduced at ratios of 1:2, 1:4, and 1:8 in two independent replicates. Boxplot illustrates the median (stripe), the 25<sup>th</sup> to 75<sup>th</sup> percentile (interquartile range), 1.5 times the interquartile range (whiskers), and outliers (open circles).

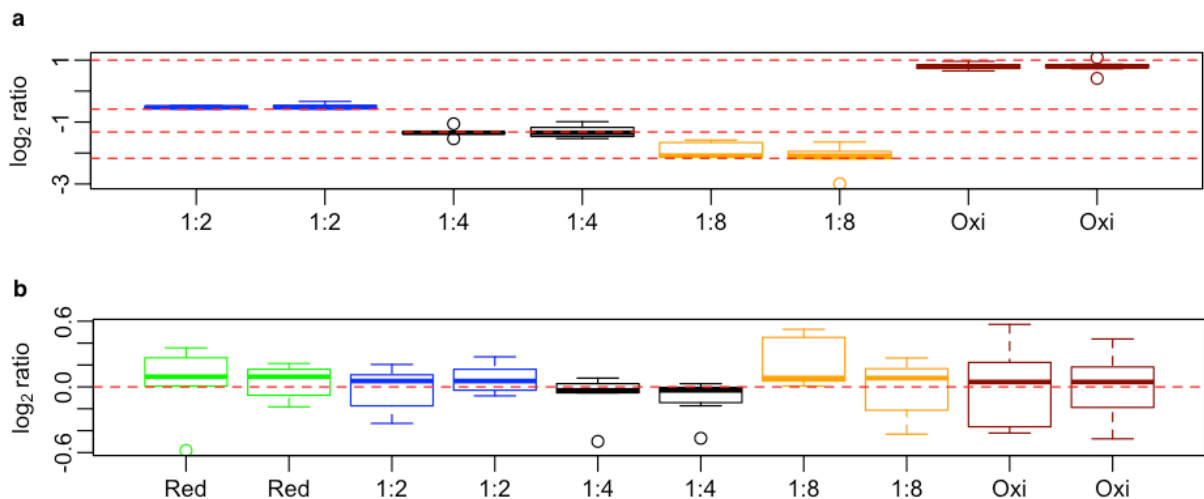

**Figure S8.** Identification and quantification of thiol redox proteins by cystTMT peptides and total protein level changes by iTRAQ peptides. Box plot showing the measured (box and whiskers) and expected values (dashed red lines) of peptide ratios for (a) cystTMT and (b) iTRAQ quantification in samples ranged from oxidized to reduced at ratios of 1:2, 1:4, and 1:8 in two independent replicates. . Boxplot illustrates the median (stripe), the 25<sup>th</sup> to 75<sup>th</sup> percentile (interquartile range), 1.5 times the interquartile range (whiskers), and outliers (open circles).

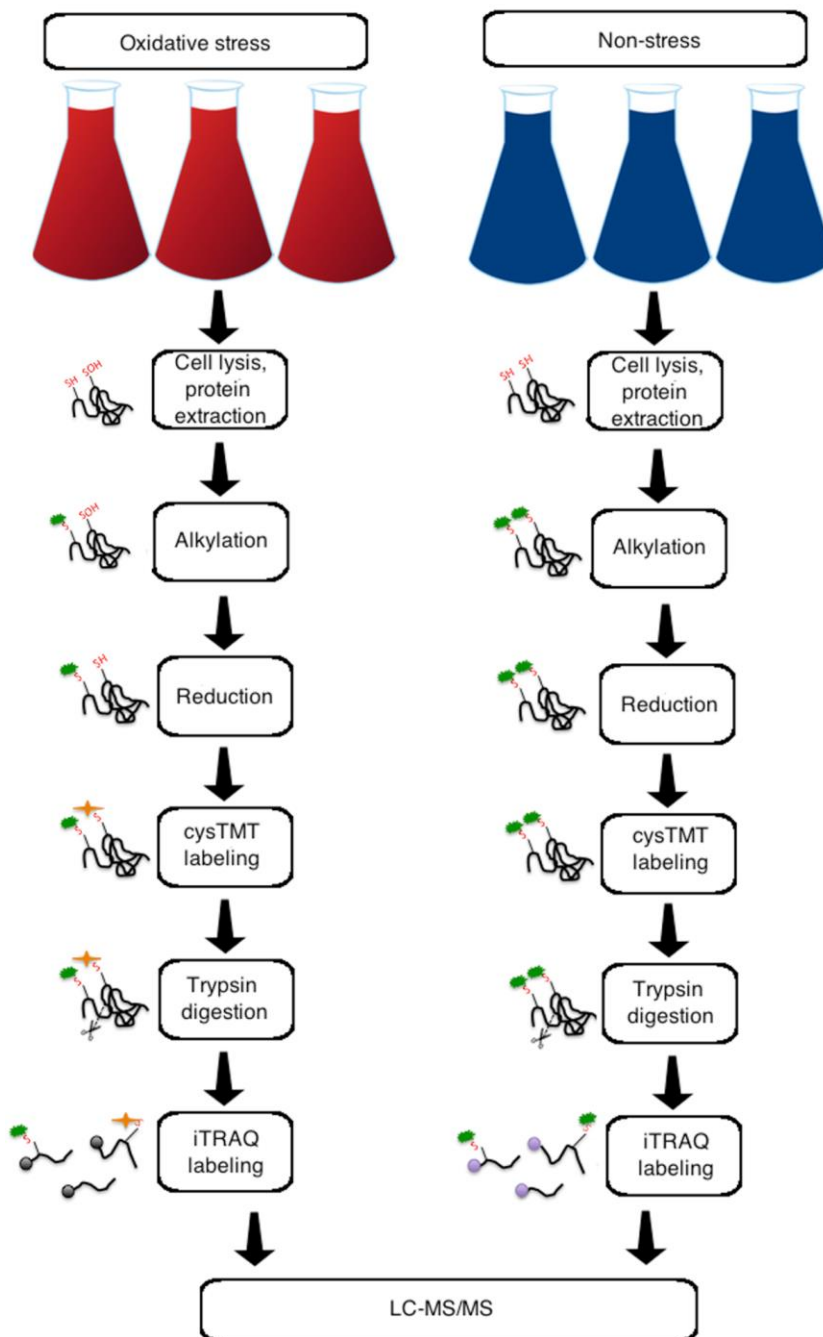

**Figure S9.** Experimental workflow of a biological application of cystMTRAQ in identification of thiol redox proteins in *Escherichia coli* after oxidative stress treatment. *E. coli* culture was divided in two samples (treatment and control), and treated sample was submitted to NaOCl oxidative stress. Total protein was extracted from both control and treated sample for cystMTRAQ double labeling in order to identify redox-regulated proteins in response to NaOCl. Three independent replicates of each sample were prepared. Scheme shows only one representative tag for iTRAQ and cystTMT, though 6 cystTMT tags ( $m/z$  126, 127, 128, 129, 130 and 131) and 6 iTRAQ tags ( $m/z$  113, 114, 116, 117, 119 and 121) were multiplexed.



**Table S1.** Redox regulated cysteine containing peptides before and after correction of protein level changes.

| Peptide                 | Protein                                        | q-value | FC (cysTMT) | FC (iTRAQ) | Corrected FC | Remarks                                                                 |
|-------------------------|------------------------------------------------|---------|-------------|------------|--------------|-------------------------------------------------------------------------|
| AALIDCLAPDR             | Outer membrane protein A                       | 0.048   | 1.3         | -          |              | Dsba substrate <sup>1</sup>                                             |
| GMGESNPVTGNTCDNVK       |                                                | 0.028   | 1.5         | -          |              |                                                                         |
| AALQISQSGQTCALLSK       | Succinate dehydrogenase, flavoprotein          | 0.046   | 0.6         | -          |              | H <sub>2</sub> O <sub>2</sub> -mediated thiol modification <sup>2</sup> |
| RGFEYSDCWVDDAR          |                                                | 0.046   | 0.8         | 1          |              |                                                                         |
| ACEEAGISAE AIDPQQAR     | Glycerol-3-phosphate dehydrogenase             | 0.049   | 0.8         | 1          |              |                                                                         |
| AIAVQAYQTLGCAGMAR       | D-ala ligase N-terminal domain protein         | 0.049   | 0.7         | 1          |              |                                                                         |
| ALSVPCSDSK              | Chaperonin GroL                                | 0.046   | 1.2         | 1          |              | Protein up-regulated in <i>dsba</i> mutant <sup>3</sup>                 |
| AMASGVSA CLATPFK        | Beta-ketoacyl-acyl-carrier-protein synthase I  | 0.046   | 0.8         | 1          |              |                                                                         |
| APSLQLSPDWTSNSCR        | Colicin I receptor                             | 0.049   | 2.4         | 1.5        | 1            |                                                                         |
| AVAEACGSQAVIVR          | Phosphoenolpyruvate-protein phosphotransferase | 0.046   | 0.6         | -          |              | S-nitrosylation <sup>4</sup>                                            |
| AVQINSLSGFCLTK          | Adenylosuccinate synthase                      | 0.047   | 1.2         | 1          |              |                                                                         |
| CFEDNGLLYDLLEQNGR       | Regulator of ribonuclease activity A           | 0.046   | 1.4         | 1.1        | 1.2          |                                                                         |
| ECITSMVSR               | Protein-export chaperone SecB                  | 0.046   | 1.2         | 1.1        |              |                                                                         |
| ELASGLSCPVGFK           | DAHPh synthase                                 | 0.046   | 1.2         | 1          |              | Thioredoxin A substrate <sup>5</sup>                                    |
| FCQFYQQDPLQR            | Uncharacterized protein conserved in bacteria  | 0.046   | 0.7         | -          |              |                                                                         |
| GCGALDWGMQSR            | Fructose-bisphosphate aldolase                 | 0.046   | 0.8         | 0.83       | 1            |                                                                         |
| GDLGLVIACLPIYA          | Ribosomal protein L35                          | 0.049   | 1.3         | -          |              | S-nitrosylation <sup>4</sup>                                            |
| GGGLCLGGK               | Bifunctional aconitate hydratase               | 0.046   | 1.3         | 1.1        |              |                                                                         |
| GSLAYAEDPCGAEQGFSGR     | Glucarate dehydratase                          | 0.05    | 0.8         | 0.9        |              |                                                                         |
| IATTNSGELLSLTPVEHVCR    | Hypothetical protein HMPREF9536                | 0.046   | 0.4         | 0.8        |              |                                                                         |
| IIGIDLGT TNSCVAIMDGTTPR | Chaperone protein DnaK                         | 0.046   | 1.2         | 1.2        |              |                                                                         |
| LCDLWLAPK               | Nitrate reductase, alpha subunit               | 0.038   | 1.6         | 1          |              |                                                                         |
| LLLECVVK                | TraM protein                                   | 0.046   | 0.7         | 0.8        | 0.9          |                                                                         |

**Table S1. Continued**

| Peptide                     | Protein                                      | q-value | FC (cysTMT) | FC (iTRAQ) | Corrected FC | Remarks                                                                 |
|-----------------------------|----------------------------------------------|---------|-------------|------------|--------------|-------------------------------------------------------------------------|
| NPNDIELYMFAQANSEHCR         | Phosphoribosylformylglycinamide synthase     | 0.046   | 0.7         | 0.9        |              |                                                                         |
| NVGSFDNNDENVGSGMVGAPACGDVMK | FeS cluster assembly scaffold IscU           | 0.046   | 2.6         | 1.1        | 2.3          |                                                                         |
| QGIPLDAGSWQAICDAAR          | Malate dehydrogenase                         | 0.047   | 1.4         | 0.9        |              | H <sub>2</sub> O <sub>2</sub> -mediated thiol modification <sup>2</sup> |
| RLFVVDAFCGANPDTR            | Phosphoenolpyruvate carboxykinase (ATP)      | 0.046   | 0.6         | 0.9        |              | S-nitrosylation <sup>6</sup>                                            |
| SQGLDDYICK                  | CTP synthase                                 | 0.046   | 1.2         | 1          |              | S-nitrosylation <sup>7</sup>                                            |
| SQQVTDACK                   | Fumarate hydratase class I                   | 0.049   | 1.3         | 1          |              |                                                                         |
| SVESEPCK                    | Hypothetical protein HMPREF9536              | 0.04    | 1.2         | -          |              |                                                                         |
| VLGLGNCTIWQTSLAGK           | Phenazine biosynthesis protein, PhzF family  | 0.05    | 0.7         | 1          |              |                                                                         |
| VSVGQEPACVK                 | Formate dehydrogenase N beta subunit         | 0.049   | 1.2         | -          |              |                                                                         |
| VVVGQEPACVK                 | Formate dehydrogenase, beta subunit, partial | 0.049   | 1.3         | 1.1        |              |                                                                         |

**References for Table S1**

1. Kadokura, H., Tian, H., Zander, T., Bardwell, J.C., Beckwith, J. (2004) Snapshots of DsbA in action: Detection of proteins in the process of oxidative folding. *Science* 303, 534-537.
2. Leichert, L.I., Gehrke, F., Gudiseva, H.V., Blackwell, T., Illbert, M., Walker, A.K., Strahler, J.R., Andrews, P.C., Jakob, U. (2008) Quantifying changes in the thiol redox proteome upon oxidative stress in vivo. *Proc Natl Acad Sci USA* 105, 8197-8202.
3. Coulthurst, S.J., Lilley, K.S., Hedley, P.E., Liu, H., Toth, I.K., Salmond, G.P.C. (2008) DsbA plays a critical and multifaceted role in the production of secreted virulence factors by the phytopathogen *Erwinia carotovora* subsp. *atroseptica*. *J. Biol. Chem.* **283**, 23739-23753 .
4. Forrester, M.T., Thompson, J.W., Foster, M.W., Nogueira, L., Moseley, M.A., Stamler, J. (2009) Proteomic analysis of S-nitrosylation and denitrosylation by resin-assisted capture. *Nat Biotechnol.* 27, 557-559 (2009).
5. Leichert, L.I., Jakob, U. (2004) Protein thiol modifications visualized in vivo. *PLoS Biol.* 2, 1723-1737.
6. Wiktorowicz, J.E., Stafford, S., Rea, H., Urvil, P., Soman, K., Kurosky, A., Perez-Polo, J.,R., Savidge, T.C. (2011) *Biochemistry* 28, 5601-5614.
7. Braun, O., Knipp, M., Chesnov, S., Vasák, M. (2007) Specific reactions of S-nitrosothiols with cysteine hydrolases: A comparative study between dimethylargininase-1 and CTP synthase. *Protein Sci.* 16, 1522-1534.
